# Supplementary material
Source: PubMed Central journal article supplement (PMC5986219)
Supplement: supp_RA117.001068_134070_2_supp_90616_p59bgb.pdf [file supp_RA117.001068_134070_2_supp_90616_p59bgb.pdf]

## SUPPORTING INFORMATION

# **The invasin D protein from *Yersinia pseudotuberculosis* selectively binds the Fab region of host antibodies and affects colonization of the intestine**

**Pooja Sadana<sup>1</sup>, Rebecca Geyer<sup>2</sup>, Joern Pezoldt<sup>3</sup>, Saskia Helmsing<sup>4</sup>, Jochen Huehn<sup>3</sup>, Michael Hust<sup>4</sup>, Petra Dersch<sup>2</sup>, Andrea Scrima<sup>1\*</sup>**

From the <sup>1</sup>Young Investigator Group Structural Biology of Autophagy, Department of Structure and Function of Proteins, the <sup>2</sup>Department of Molecular Infection Biology, the <sup>3</sup>Department of Experimental Immunology, Helmholtz-Centre for Infection Research, Braunschweig, Germany, the <sup>4</sup>Institute of Biochemistry, Biotechnology and Bioinformatics, Technische Universität Braunschweig, Germany.

Running title: InvD selectively binds the Fab region of antibodies

The supporting information contains:

- one supplemental table
- five supplemental figures
- supporting references

## SUPPORTING TABLES

Table S1

| Strain or Plasmid or Primer            | Description                                                                                                                                                                                                                                    | Source or reference |
|----------------------------------------|------------------------------------------------------------------------------------------------------------------------------------------------------------------------------------------------------------------------------------------------|---------------------|
| <b>Bacterial Strains</b>               |                                                                                                                                                                                                                                                |                     |
| <i>E. coli</i> K12                     |                                                                                                                                                                                                                                                |                     |
| <b>DH101<math>\beta</math></b>         | <i>F-endA1 recA1 galE15 galK16 nupG rpsL</i><br><i><math>\Delta</math>lacX74<math>\Phi</math>80lacZ<math>\Delta</math>M15araD139<math>\Delta</math>(ara,leu)7697</i><br><i>mcrA <math>\Delta</math>(mrr-hsdRMS-mcrBC)<math>\lambda</math>-</i> | Invitrogen          |
| <b>DH5<math>\alpha</math></b>          | <i>F-<math>\Phi</math>80lacZ<math>\Delta</math>M15 <math>\Delta</math>(lacZYA-argF) U169</i><br><i>recA1endA1hsdR17 (rk-, mk+) phoAsupE44<math>\lambda</math> -</i><br><i>thi-1 gyrA96 relA1</i>                                               | Invitrogen          |
| <b>S17-1 <math>\lambda</math>pir</b>   | <i>recA thi pro hsdR-M<sup>+</sup>(RP4-2 Tc::Mu-Km::Tn7),</i><br><i><math>\lambda</math>pir</i>                                                                                                                                                | (1)                 |
| <b>Rosetta2 DE3</b>                    | <i>F- ompT hsdS<sub>B</sub> (r<sub>B</sub>- m<sub>B</sub>-) gal dcm (DE3)</i><br>pRARE2 (Cam <sup>R</sup> )                                                                                                                                    | Invitrogen          |
| <i>Y. pseudotuberculosis</i>           |                                                                                                                                                                                                                                                |                     |
| <b>YPIII</b>                           | pIB1, wild type                                                                                                                                                                                                                                | (2)                 |
| <b>YP197 (<math>\Delta</math>invD)</b> | <i>YPIII invD::kan</i>                                                                                                                                                                                                                         | This study          |
| <b>Plasmids</b>                        |                                                                                                                                                                                                                                                |                     |
| <b>pPS001</b>                          | pET28derived, InvD_P1737-1976,Kan <sup>R</sup> ,N-His6                                                                                                                                                                                         | This study          |
| <b>pPS003</b>                          | pCOLA Duet, InvD G1640-1976, Kan <sup>R</sup> ,N-His6                                                                                                                                                                                          | This study          |
| <b>pPS004</b>                          | pCOLA Duet, InvD P1838-1976, Kan <sup>R</sup> ,N-His6                                                                                                                                                                                          | This study          |
| <b>pPS005</b>                          | pCOLA Duet, InvD G1640-1976, Kan <sup>R</sup> ,N-Strep                                                                                                                                                                                         | This study          |
| <b>pPS029</b>                          | pCOLA Duet, InvD G1640-1839, Kan <sup>R</sup> ,N-Strep                                                                                                                                                                                         | This study          |
| <b>pPS019</b>                          | pCOLA Duet, InvDG1640-1976,Kan <sup>R</sup> ,<br>N-His6_TEV_3xflag                                                                                                                                                                             | This study          |
| <b>pPS020</b>                          | pCOLA Duet, InvD G1640-1839,Kan <sup>R</sup> ,<br>N-His6_TEV_3xflag                                                                                                                                                                            | This study          |
| <b>pPS021</b>                          | pCOLA Duet, InvA P500-I985,Kan <sup>R</sup> ,<br>N-His6_TEV_3xflag                                                                                                                                                                             | This study          |
| <b>pAKH3</b>                           | <i>sacB<sup>+</sup>, Amp<sup>R</sup></i>                                                                                                                                                                                                       | (3)                 |
| <b>pFU54</b>                           | <i>luxCDABE, ori SC101*, Amp<sup>R</sup></i>                                                                                                                                                                                                   | (4)                 |

|                           |                                                             |            |
|---------------------------|-------------------------------------------------------------|------------|
| <b>pFU58</b>              | <i>gfpmut3.1</i> , ori29807, Amp <sup>R</sup>               | (4)        |
| <b>pFU189</b>             | <i>luxCDABE</i> , ori ColE1, Cm <sup>R</sup>                | (5)        |
| <b>pFU217</b>             | <i>invA-luxCDABE</i> , ori ColE1, Cm <sup>R</sup>           | (5)        |
| <b>pFU228</b>             | <i>gapDH-dsred2</i> , ori ColE1, Cm <sup>R</sup>            | (4)        |
| <b>pKD4</b>               | Kanamycin cassette template, Kan <sup>R</sup>               | (6)        |
| <b>pCP20</b>              | <i>flp</i> , ori SC101 <sub>is</sub> , Amp <sup>R</sup>     | (6)        |
| <b>pRG01</b>              | pFU58, <i>invD-gfpmut3.1</i> , ori29807, Amp <sup>R</sup>   | This study |
| <b>pRG03</b>              | pFU54, <i>invD-luxCDABE</i> , oriSC101*, Amp <sup>R</sup>   | This study |
| <b>pRG05</b>              | pRG03, <i>invD-luxCDABE</i> , ori ColE1, Amp <sup>R</sup>   | This study |
| <b>pRG09</b>              | pAKH3, <i>invD::kn, sacB<sup>+</sup></i> , Amp <sup>R</sup> | This study |
| <b>Primers</b>            |                                                             |            |
| <b>III790</b>             | CCGGGGGATCCCCTATCCCCACATC<br>CAAAATCAGAGATTT                |            |
| <b>III791</b>             | CCGGGGTCGACTTAATATACGCTCAT<br>AGATAACGAACACCC               |            |
| <b>III792</b>             | CCGGGGAGCTCCCTATCCCCACATC<br>CAAAATCAGAGA                   |            |
| <b>III797</b>             | GCTCATAGATAACGAAACAACCTTCTT<br>TA                           |            |
| <b>III793</b>             | CCGGGGAGCTCACATCTCGTCCACTT<br>CGCAAATGAG                    |            |
| <b>III795</b>             | CCGGGGAGCTCGTTAGTAGTTAATGC<br>GGCTCTGTCGA                   |            |
| <b>I661</b>               | GTGTAGGCTGGAGCTGCTTC                                        |            |
| <b>I662</b>               | CATATGAATATCCTCCTTAGTTCC                                    |            |
| <b>InvD_G1640_n_f</b>     | AAGAATGCGGCCGCGCAACCTGAG<br>CACCACGAAC                      |            |
| <b>InvD_N1976_P_r</b>     | TTTTCTGCAG TTA GTTAGATCCGG                                  |            |
| <b>ΔAD-InvD_G1839_P_r</b> | TTTTCTGCAGTTACCCCGCGTTATTGT<br>CACCATC                      |            |
| <b>InvA_P500_notI_f</b>   | AAGAATGCGGCCGCCCTCAGTTGACAT<br>TAACGGCGGCC                  |            |
| <b>InvA_I985_pstI_r</b>   | TTTTCTGCAGTTATATTGACAGCGCACA<br>GAGCGG                      |            |

\* reduced copy number variant (1-2 copies/cell)

## SUPPORTING FIGURES

### FIGURE S1

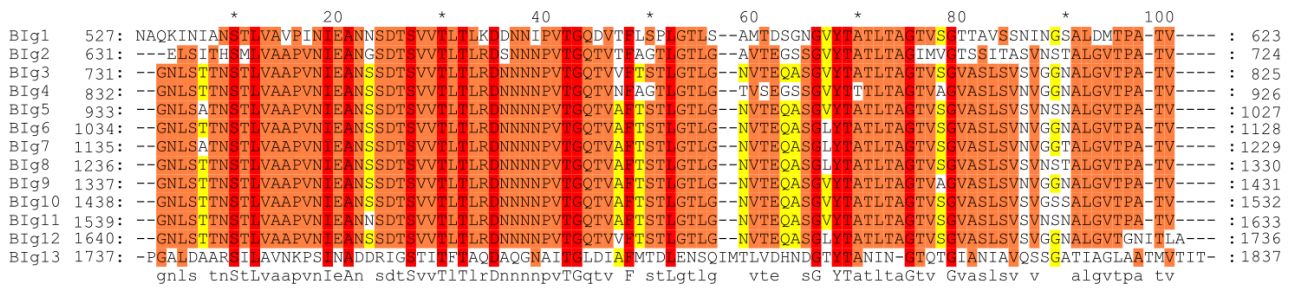

**Fig. S1. Details on sequence similarity of InvD.** Sequence alignment of BIg1-13 domains of InvD (100% conserved amino acids are marked in red, 80 % in orange and 60 % in yellow). Alignment is generated with Genedoc (7).

### FIGURE S2

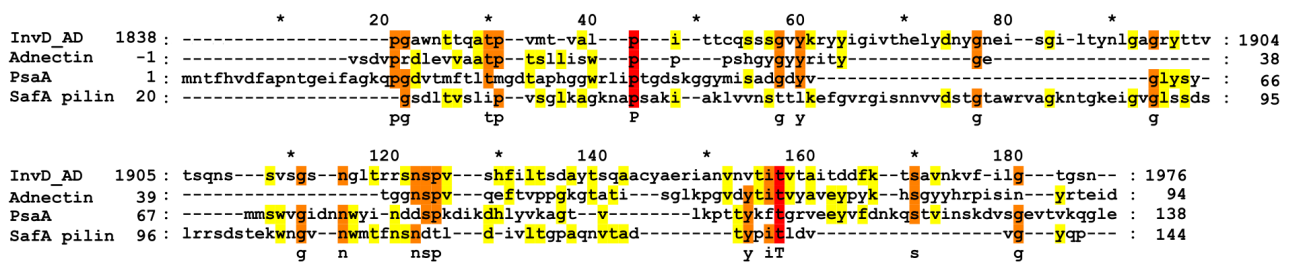

**Fig. S2. Similarity to InvD-AD.** Sequence alignment of InvD-AD with Adnectin (4OV6:G), PsaA (4F80:A) and Safa pilin (2CNY:A). (100% conserved amino acids are marked in red, 80% in orange and 60% in yellow). Alignment is generated with Genedoc (7).

### FIGURE S3

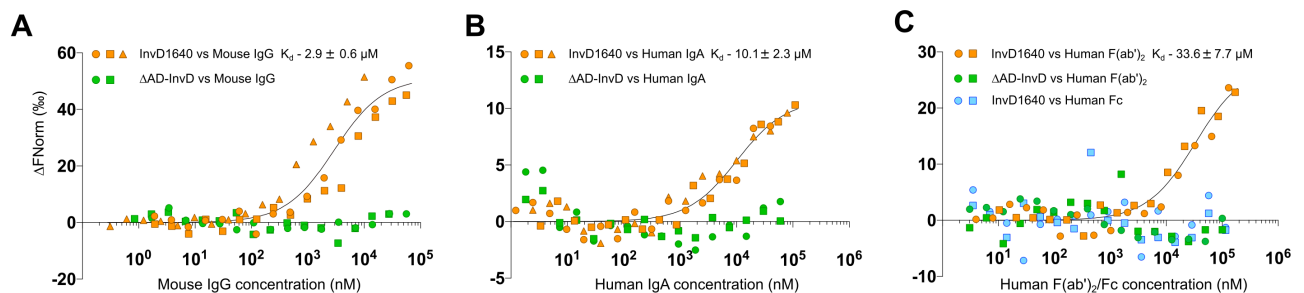

**Fig. S3. Analysis of InvD-immunoglobulin interaction.** Binding affinities of InvD1640 with mouse IgG (A), human IgA (B) and human  $F(ab')_2$  or Fc (C) were determined by Microscale Thermophoresis. ΔAD-InvD (lacking the adhesion domain) was used as a negative control. Individual measurements performed with different concentrations of antibodies are shown. As the data does not reach saturation, the affinity constant ( $K_d$ ) could not be precisely quantified, but the data allowed for an estimation of the approximate  $K_d$  using a global fit in the software DYNAFIT (8).

**FIGURE S4**

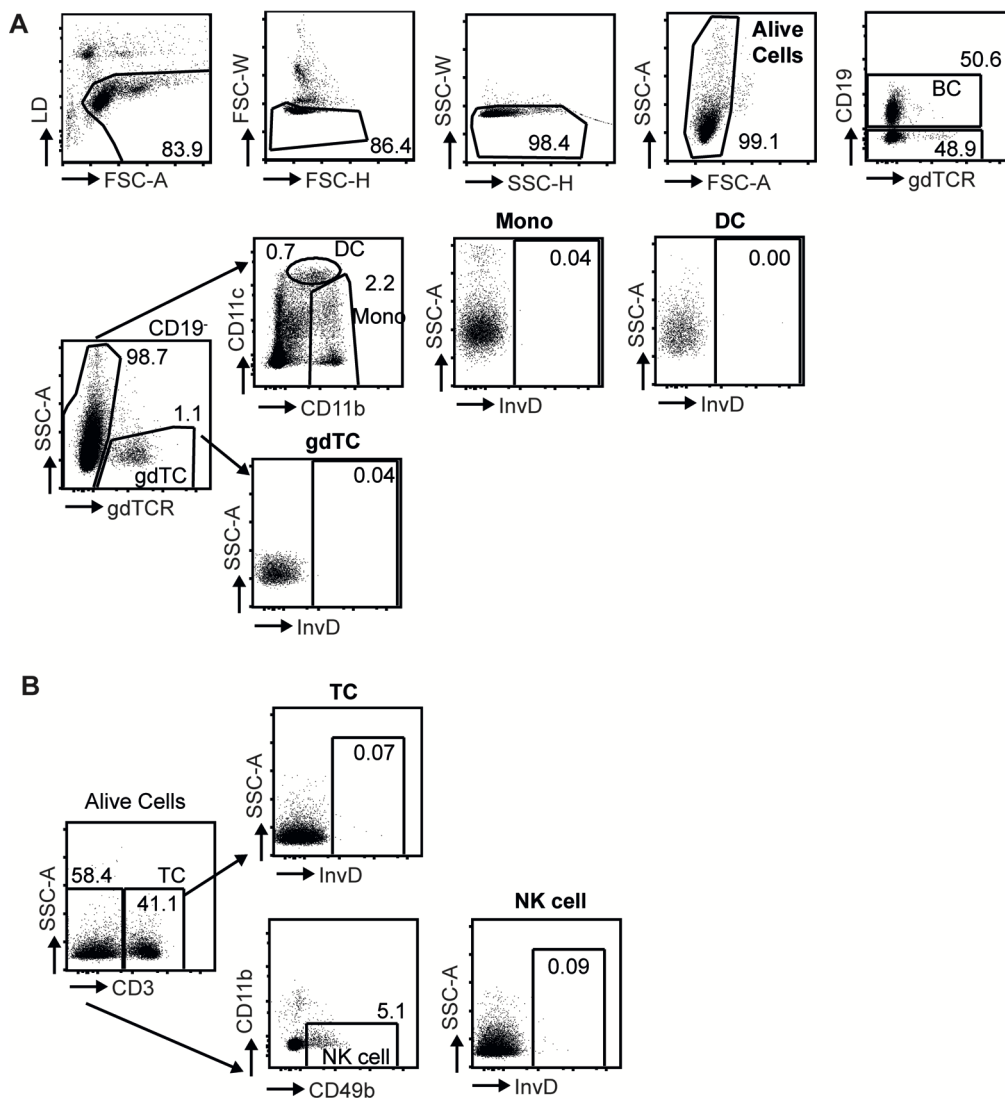

**Fig. S4. Gating strategy for the identification of different hematopoietic cell subsets.** Single cell suspensions from spleens were analyzed using flow cytometry. Numbers indicate frequency of parental population. All gatings on specific hematopoietic cell populations rely on previous exclusion of dead cells and duplets.

(A) Gating strategy for the identification of B cells (CD19<sup>+</sup>),  $\gamma\delta$ T cells (CD19<sup>-</sup> $\gamma\delta$ TCR<sup>+</sup>), dendritic cells (DC, CD19<sup>-</sup> $\gamma\delta$ TCR<sup>-</sup>CD11b<sup>med</sup>CD11c<sup>+</sup>) and monocytes (Mono, CD19<sup>-</sup> $\gamma\delta$ TCR<sup>-</sup>CD11c<sup>low</sup>CD11b<sup>+</sup>).

(B) Gating strategy for the identification of T cells (TC, CD3<sup>+</sup>) and NK cells (CD3<sup>+</sup>CD49b<sup>+</sup>).



**Fig. S5. Identification and alignment of positive clones obtained from phage display panning.** (A-B) Binding assessment of soluble scFv to InvD1640 by ELISA. Binding of soluble scFv from (A) HAL10 and (B) HAL9+10 library to InvD1640 (Invd strep) and  $\Delta$ AD-InvD (Neg. control) was analyzed by microtiter plate ELISA. Green bar represents the positive control (lysozyme + anti-lysozyme scFv), blue bar represents the background signal of the system (streptavidin + *E. coli* supernatant + components of detection system). (C) Alignment of 59 sequenced VH fragments (from HAL 9+10 library) indicates broad diversity in CDR3 region.

## SUPPORTING REFERENCES

1. Simon, R., Prierer, U., and Puhler, A. (1983) A Broad Host Range Mobilization System for In Vivo Genetic Engineering: Transposon Mutagenesis in Gram Negative Bacteria. *Nat Biotech.* **1**, 784–791
2. Bölin, I., Norlander, L., and Wolf-Watz, H. (1982) Temperature-inducible outer membrane protein of *Yersinia pseudotuberculosis* and *Yersinia enterocolitica* is associated with the virulence plasmid. *Infect. Immun.* **37**, 506–12
3. Nagel, G., Lahrz, a., and Dersch, P. (2001) Environmental control of invasin expression in *Yersinia pseudotuberculosis* is mediated by regulation of RovA, a transcriptional activator of the SlyA/Hor family. *Mol. Microbiol.* **41**, 1249–1269
4. Uliczka, F., Pisano, F., Kochut, A., Opitz, W., Herbst, K., Stolz, T., and Dersch, P. (2011) Monitoring of gene expression in bacteria during infections using an adaptable set of bioluminescent, fluorescent and colorigenic fusion vectors. *PLoS One.* **6**, e20425
5. Pisano, F., Kochut, A., Uliczka, F., Geyer, R., Stolz, T., Thiermann, T., Rohde, M., and Dersch, P. (2012) In vivo-induced InvA-like autotransporters Ifp and InvC of *Yersinia pseudotuberculosis* promote interactions with intestinal epithelial cells and contribute to virulence. *Infect. Immun.* **80**, 1050–64
6. Datsenko, K. A., and Wanner, B. L. (2000) One-step inactivation of chromosomal genes in *Escherichia coli* K-12 using PCR products. *Proc. Natl. Acad. Sci. U. S. A.* **97**, 6640–6645
7. Nicholas, K. B., Nicholas, H. B. J., and Deerfield, D. W. I. (1996) GeneDoc: Analysis and visualization of genetic variation, *EMBNEW.* **4**, 14
8. Kuzmic, P. (1996) Program DYNAFIT for the analysis of enzyme kinetic data: application to HIV proteinase. *Anal. Biochem.* **237**, 260–273
